# Supplementary material for: Antimicrobial Resistance, Conjugative Plasmids and Pathogenicity in Escherichia spp. isolated from Natural water and Wastewater Environments in Stockholm, Sweden
Source: Research Square preprint supplement (doi:10.21203/rs.3.rs-6730951/v1), 2025-06-17
Supplement: Supplementary file 1 [file 0d1f631858735baf4c972271.docx]

**Supplementary figures**


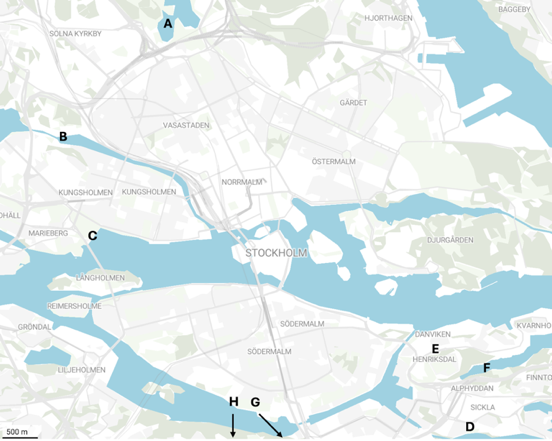


**Supplementary figure 1. Map of water sampling locations in Stockholm, Sweden.** Brunnsviken inHagaparken (A), Karlbergskanalen (B), Rålambshovsparken (C), Sickla Inlet (D), Henriksdal Inlet (E), Henriksdal Outlet (F), Tyresö Fiskarholmen (G), Nynäshamn (H). A, B and C are urban freshwater sites. E, F and D are from the wastewater treatment plant. H and G are not seen on the map, these samples are from brackish water. <https://app.datawrapper.de/edit/e5IV1/design>


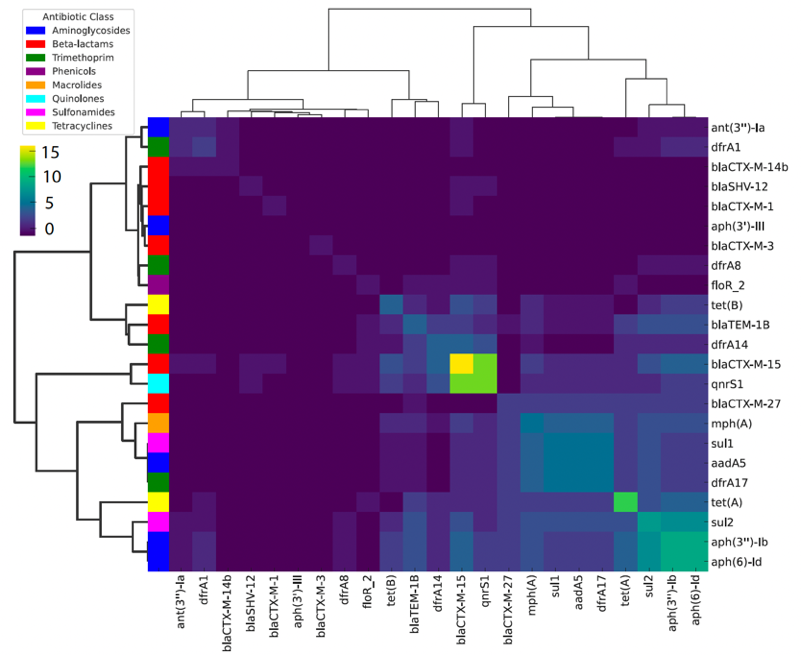
**Supplementary figure 2. Co-occurrence of antibiotic resistance genes (ARGs) in the isolates from Stockholm.** Clustering on the y and upper x-axis indicates the isolates involved in the analysis. Colour intensity (blue to yellow) indicates more frequent co-occurrence. The most commonly found ARG was *bla*CTX-M-15 and the co-occurrence of *bla*CTX-M-15 and *qnrS1* is the most frequent. The *mdf(A)* ARG was removed from this analysis since it is present in all isolates. Correlation was used as the clustering method and the pheatmap R program was used to generate the heatmap.
