# Supplementary material for: Antimicrobial Resistance, Conjugative Plasmids and Pathogenicity in Escherichia spp. isolated from Natural water and Wastewater Environments in Stockholm, Sweden
Source: Research Square preprint supplement (doi:10.21203/rs.3.rs-6730951/v1), 2025-06-17
Supplement: Supplementary file 2 [file 1e2ef2f1121843cd426fdf2e.docx]

**Supplementary tables**

**Supplementary Table 1. Virulence genes associated with *E. coli* pathotype species (ETEC, UPEC, STEC, EAEC, EHEC) found in this study.** The first column described the isolate (the number which the solate is referred to as throughout the paper, and the code which describes its origin); the second column shows the Multi-sequence locus type (MLST) and columns 3-9 shows virulence genes present in the isolate belonging to different groups. By examining the annotations, the following genes were found in the isolates: Adhesins (*lpfA, eae, sfaA, iha, nfaE, air, eilA, aap, aatA, agg, aar, afa, PAP, auf, aaiC, tia*), Toxins (*cnf1, vat, senB, pic, astA, tsh, sta2, tcpC, tosA, sat, hlyA, cdt*), Siderophores (*iroN, ireA, aer, iutA, entS, fyuA, ybtP, ybtQ, chuA, iha, sitA*), Serum resistance (*iss, cvaC*), Colicins/Microcins (*mchB, mchC, mchF, cma*), Outer membrane proteins (*ompT*), and additional virulence genes (*capU* and *terC*). EAEC: Enteroaggregative *E. coli*; ETEC: Enterotoxigenic *E. coli;* STEC: Shiga toxin-producing *E. coli*; EPEC: Enteropathogenic *E. coli*; ExPEC: Extraintestinal pathogenic *E. coli*; UPEC: Uropathogenic *E. coli*. Supplementary table 2 describes the virulence genes.

| **Isolate** | **MLST** | **Virulence genes** | | | | | | |
| --- | --- | --- | --- | --- | --- | --- | --- | --- |
| **Adhesins** | **Toxins** | **Siderophores** | **Serum resistance** | **Colicins/ Microcins** | **Outer membrane proteins** | **Additional** |
| **1. SE-N-W-Ec10** | 10980 | *yfcV* |  | *entS, iroN, sitA* | *iss* | *cma* |  |  |
| **2. SE-HDO-W-EcE4** | 127 | *papB, sfaA, aufA, papG-III* | *vat, tcpC* | *fyuA, entS, iroN, ybtP, ybtQ, chuA, sitA* | *iss* | *mchF* | *ompT* |  |
| **4. SE-N-S-Ec1** | 3247 | *eilA, papB, papC, sfaA, aufA, lpfA,* |  | *entS, chuA* | *iss* |  | *ompT* |  |
| **5. SE-Si-W-Ec1** | 404 | *papA, sfaA, aufA, iha, lpfA* | *sat, senB, vat* | *iutA, fyuA, entS, ybtP, ybtQ, chuA, sitA, iucC, iha* |  |  | *ompT* |  |
| **6. SE-R-E-Ec1** | 6496 | *papB, aufA, lpfA* |  | *entS, chuA, sitA* |  |  | *ompT* |  |
| **7. SE-HDI-W-Ec5** | 607 | *lpfA, mrk, yfcV* |  | *entS* |  |  |  |  |
| **8. SE-HDI-E-Ec2** | 710 | *mrk* |  | *entS* |  |  |  |  |
| **9. SE-HDO-W-EcE5 (p)** | 38 | *air/eaeX, eilA, sfaA,* |  | *entS, chuA* | *iss* |  | *ompT* |  |
| **10. SE-HDI-W-Ec8 (p)** | 607 | *lpfA, mrk, yfcV* |  | *entS* |  |  |  |  |
| **11. SE-H-S-Ec1-1 (p)** | 133 | *aufA* |  | *fyuA, entS, ybtP, ybtQ, chuA, sitA* |  |  | *ompT* |  |
| **12. SE-SI-W-Ec8 (p)** | 357 | *sfaA* | *vat* | *fyuA, entS, ybtP, ybtQ, chuA, sitA* | *iss* |  | *ompT* |  |
| **13. SE-HD-W-EcE6 (p)** | 131 | *papA, sfaA, iha* | *sat, senB* | *iutA, fyuA, entS, ybtP, ybtQ, chuA, sitA, iucC, iha* | *iss* |  | *ompT* |  |
| **14. SE-SI-W-EcE2 (p)** | 3873 | *sfaA, lpfA, bfpB/E, yfcV* |  | *fyuA, entS, ybtP, ybtQ* |  |  |  |  |
| **15. SE-SI-W-EcE5 (p)** | 38 | *air/eaeX, eilA, papB, papC, sfaA, bfpB/E* |  | *entS, chuA, sitA* |  |  |  |  |
| **16. SE-R-S-Ec3 (p)** | 2026 | *sfaA, lpfA, yfcV* |  | *entS, iroN, sitA* | *iss, cvaC* | *cma* |  |  |
| **17. SE-HD-W-Ec7 (p)** | 196 | *sfaA, lpfA, yfcV* |  | *entS* |  |  |  |  |
| **18. SE-HDI-W-EcE1 (p)** | 683 | *sfaA, lpfA, yfcV* |  | *entS, iroN, sitA* | *iss, cvaC* | *cma* |  |  |
| **19. SE-HD-W-Ec1 (p)** | 472 | *sfaA, lpfA, yfcV* |  | *entS* |  |  |  |  |
| **20. SE-SI-W-EcE8 (p)** | 38 | *air/EaeX, eilA, sfaA* |  | *entS, chuA, sitA* |  |  |  |  |
| **22. SE-N-W-Ec1 (p)** | 2521 | *aggR, sfaA, lpfA, yfcV* |  | *entS* | *iss* |  | *ompT* |  |
| **23. SE-HDO-W-EcE1 (p)** | 7326 | *aggR, aap, aatA, agg4A, sfaA, lpfA, aaiC, yfcV* | *sepA, pic, sat* | *iutA, fyuA, entS, ybtP, ybtQ, iucC* |  | *mchB, mchC, mchF* |  | *capU* |
| **35. SE-N-W-Ec1 COL-R** | 13281 | *papC, sfaA* | *cdt, vat* | *fyuA, entS, iroN, ,ybtP, ybtQ, chuA, sitA* | *iss* | *cma* | *ompT* |  |
| **36. SE-N-W-E2 COL-R** | 13281 | *papC, sfaA* | *cdt, vat* | *fyuA, entS, iroN, ,ybtP, ybtQ, chuA, sitA* | *iss* | *cma* | *ompT* |  |
| **37. SE-N-W-Ec3 COL-R** | 13281 | *papC, sfaA* | *cdt, vat* | *fyuA, entS, iroN, ,ybtP, ybtQ, chuA, sitA* | *iss* | *cma* | *ompT* |  |
| **38. SE-N-W-Ec4 COL-R** | 13281 | *papC, sfaA* | *cdt, vat* | *fyuA, entS, iroN, ,ybtP, ybtQ, chuA, sitA* | *iss* | *cma* | *ompT* |  |
| **39. SE-N-W-Ec5 (IN/M?) COL-R** | 13281 | *sfaA* | *cdt, vat* | *fyuA, entS, iroN, ,ybtP, ybtQ, chuA, sitA* | *iss* | *cma* | *ompT* |  |
| **40. SE-N-W-Ec6 (IN/M?) COL-R** | 13281 | *papC, sfaA* | *cdt, vat* | *fyuA, entS, iroN, ,ybtP, ybtQ, chuA, sitA* | *iss* | *cma* | *ompT* |  |
| **41. SE-HDI-W-EcE2** | 6872 | *aatA, sfaA, cfaE, bfpB/E, yfcV, tia* | *sta2* | *fyuA, entS, ybtP, ybtQ* |  |  |  |  |
| **42. SE-HDI-W-EcE3 (G4)** | 10 | *sfaA, bfpB/E, yfcV* |  | *entS* | *iss* |  |  |  |
| **43. SE-HDI-W-EcE4** | 38 | *air/eaeX, eilA, papG-II, papA, papB, papC, sfaA, iha* | *sat, hylA* | *iutA, fyuA, entS, ybtP, ybtQ, chuA, sitA, iucC, iha* | *iss* |  |  | *capU* |
| **44. SE-HDI-W-EcE5** | 38 | *air/eaeX, eilA, sfaA* |  | *entS, chuA* | *iss* |  | *ompT* |  |
| **45. SE-HDI-W-EcE6** | 131 | *papA, sfaA, iha* | *sat, senB* | *iutA, fyuA, entS, ybtP, ybtQ, chuA, sitA, iucC, iha* | *iss* |  | *ompT* |  |
| **46. SE-HDI-W-EcE7** | 58 | *sfaA, lpfA* |  | *iutA, entS, iroN, sitA, iucC* | *iss, cvaC* | *mchF* |  | *capU* |
| **47. SE-SI-W-EcE3** | 1442 | *papC, sfaA, aufA, lpfA* | *cdt, vat* | *fyuA, entS, iroN, ybtP, ybtQ, chuA, sitA* | *iss* | *cma* | *ompT* |  |
| **48. SE-SI-W-EcE4** | 636 | *sfaA, aufA, nfaE, lpfA, afaA* | *vat, tcpC* | *iutA, fyuA, entS, ybtP, ybtQ, chuA, sitA, iucC* |  |  | *ompT* |  |
| **49. SE-SI-W-EcE1** | 2522 | *sfaA, lpfA, yfcV* |  | *entS* |  |  |  | *capU* |
| **50. SE-SI-W-EcE6** | 38 | *air/eaeX, eilA, sfaA* |  | *entS, chuA, sitA* |  |  |  |  |
| **51. SE-SI-W-EcE7** | unknown | *air/eaeX, eilA, sfaA* |  | *entS, chuA* | *iss* |  | *ompT* | *capU* |
| **52. SE-HDO-W-EcE8** | 131 | *papG-II, papA, papB, papC, sfaA, iha, tia* | *sat, senB, cnf1, hlyA* | *iutA, fyuA, entS, ybtP, ybtQ, chuA, sitA, iucC, iha* |  |  | *ompT* |  |
| **53. SE-H-S-Ec1** | 133 | *aufA* |  | *fyuA, entS, ybtP, ybtQ, chuA, sitA* |  |  | *ompT* |  |
| **54. SE-H-S-Tc-CTX2** | 2026 | *sfaA, lpfA, yfcV* |  | *entS, iroN, sitA* | *iss, cvaC* | *cma* |  |  |
| **55. SE-H-S-Tc-CTX3** | 133 | *aufA* |  | *fyuA, entS, ybtP, ybtQ, chuA, sitA* |  |  | *ompT* |  |
| **56. 1SE-N-W-Ec2** | 10980 | *yfcV* |  | *entS, iroN, sitA* | *iss* | *cma* |  |  |
| **57. 1SE-N-W-Ec11** | 10980 | *yfcV* |  | *entS, iroN, sitA* | *iss* | *cma* |  |  |
| **58. 1SE-N-W-Ec12** | unknown | *aggR, sfaA, lpfA, yfcV, tia* |  |  | *iss* |  | *ompT* |  |
| **63. SE-HDI-W-Ec1** | 607 | *lpfA, mrk, yfcV* |  | *entS* |  |  |  |  |
| **64. SE-HDI-W-Ec3** | 164 | *sfaA, lpfA, yfcV* |  | *entS* |  |  |  |  |
| **65. SE-HDI-W-Ec4** | unknown | *sfaA, yfcV* |  | *entS, sitA* | *iss* |  |  |  |
| **66. SE-HDI-W-Ec6** | 607 | *lpfA, mrk, yfcV* |  | *entS* |  |  |  |  |
| **67. SE-HDI-W-Ec7** | 10 | *yfcV* | *senB* | *fyuA, entS, ybtP, ybtQ* |  |  |  |  |
| **68. SE-R1-W-Ec2** | 6496 | *papB, aufA, lpfA* |  | *entS, chuA, sitA* |  |  | *ompT* |  |
| **71. SE-R1-S-Ec4** | 362 | *eilA, papB, sfaA, aufA* | *cdt* | *entS, chuA* |  |  | *ompT* |  |
| **72. SE-H-S-Ec1-1** | 133 | *aufA* |  | *fyuA, entS, ybtP, ybtQ, chuA, sitA* |  |  | *ompT* |  |
| **73. SE-HDO-Ec7** | 196 | *sfaA, lpfA, yfcV* |  | *entS* |  |  |  |  |
| **74. SE-HDO-Ec8** | 607 | *lpfA, mrk, yfcV* |  | *entS* |  |  |  |  |
| **75. 1SE-T-W-Ec1** | 351 | *sfaA, lpfA, yfcV* |  | *entS, sitA* | *iss* |  | *ompT* |  |
| **76. 1SE-T-W-Ec2** | 351 | *sfaA, lpfA, yfcV* |  | *entS, sitA* | *iss* |  | *ompT* |  |
| **77. 1SE-T-W-Ec3** | 351 | *sfaA, lpfA, yfcV* |  | *entS, sitA* | *iss* |  | *ompT* |  |
| **78. 1SE-N-S-Ec1** | 3247 | *eilA, papB, papC, sfaA, aufA, lpfA* |  | *entS, chuA* | *iss* |  | *ompT* |  |
| **79. 1SE-T-W-Ec4** | 351 | *sfaA, lpfA, yfcV* |  | *entS, sitA* | *iss* |  | *ompT* |  |
| **80. 1SE-T-W-Ec5** | 351 | *sfaA, lpfA, yfcV* |  | *entS, sitA* | *iss* |  | *ompT* |  |
| **81. 1SE-T-W-Ec6** | 351 | *sfaA, lpfA, yfcV* |  | *entS, sitA* | *iss* |  | *ompT* |  |
| **82. 1SE-T-W-Ec7** | 351 | *sfaA, lpfA, yfcV* |  | *entS, sitA* | *iss* |  | *ompT* |  |
| **83. SE-HDO-W-Ec3** | 635 | *sfaA, lpfA, yfcV* |  | *entS, sitA* |  |  |  |  |
| **84. SE-HDO-W-Ec4** | 34 | *aggR, aar, aap, aatA, aggA, aaiC, yfcV* | *pic, sat* | *fyuA, entS, ybtP, ybtQ* |  | *mchF* |  | *capU, terC* |
| **86. SE-HDO-W-Ec6** | 95 | *papG-II, papA, papB, papC, sfaA, aufA, tia* | *senB, vat, tcpC* | *ireA, fyuA, entS, ybtP, ybtQ, chuA, sitA* | *iss* |  | *ompT* |  |
| **88. SE-SI-W-Ec3** | 1567 | *eilA, sfaA* |  | *entS, chuA* |  |  |  |  |
| **89. SE-SI-W-Ec4** | 108 | *eilA, sfaA* |  | *entS, chuA, sitA* | *iss* |  |  |  |
| **90. SE-SI-W-Ec5** | 607 | *lpfA, mrk, yfcV* |  | *entS* |  |  |  |  |

**Supplementary Table 2. Virulence gene descriptions and prevalence in isolates.** The information in the table was collected from different sources1-3. The gene name, gene description, which pathotype species the gene is associated withand its occurrence in the isolates is displayed in the first four columns. In the last column, the prevalence in the whole isolate collection is shown. EAEC: Enteroaggregative *E. coli*; ETEC: Enterotoxigenic *E. coli;* STEC: Shiga toxin-producing *E. coli*; EPEC: Enteropathogenic *E. coli*; ExPEC: Extraintestinal pathogenic *E. coli*; UPEC: Uropathogenic *E. coli*.

| **Gene** | **Gene Description** | **Pathotype species** | **Total number** | **%/69** |
| --- | --- | --- | --- | --- |
| ***aggR*** | Transcriptional activator | EAEC | 4 | 5.80 |
| *aar* | AggR-activated regulator | EAEC | 1 | 1.45 |
| *aaiC* | AaiC, secreted protein | EAEC | 2 | 2.90 |
| *aap* | Dispersin, antiaggregation protein | EAEC | 2 | 2.90 |
| *aatA* | Dispersin, transporter protein | EAEC | 3 | 4.35 |
| ***aggA*** | AAF/I fimbrial subunit | EAEC | 1 | 1.45 |
| ***agg4A*** | AAF/IV fimbrial subunit | EAEC | 1 | 1.45 |
| *capU* | Hexosyltransferase homolog | EAEC | 6 | 8.70 |
| *air/eaeX* | Enteroagregative immunoglobulin repeat protein | EAEC | 7 | 10.14 |
| *eilA* | *Salmonella* HilA homolog | EAEC | 12 | 17.39 |
| ***sepA*** | *Shigella* extracellular protease | EAEC/EIEC | 1 | 1.45 |
| ***pic*** | Serine protease precursor | EAEC/EIEC | 2 | 2.90 |
| ***sat*** | Secreted autotransporter toxin | EAEC/ExPEC | 7 | 10.14 |
| *ireA* | Siderophore receptor | ExPEC | 1 | 1.45 |
| ***iss*** | Increased serum survival | ExPEC | 37 | 53.62 |
| *papGII* | P-fimbriae | ExPEC | 3 | 4.35 |
| *papA* | P-fimbriae | ExPEC | 6 | 8.70 |
| *papB* | P-fimbriae | ExPEC | 10 | 14.49 |
| *papC* | Pilus-associated protein C | ExPEC | 12 | 17.39 |
| *ompT* | Outer membrane protease gene | ExPEC | 36 | 52.17 |
| *sfaA* | S-fimbriae | ExPEC | 51 | 73.91 |
| *chuA* | *E. coli* heam-utilization gene | ExPEC | 33 | 47.83 |
| *iutA* | Aerobactin receptor | ExPEC | 8 | 11.59 |
| *fyuA* | Yersiniabactin receptor | ExPEC | 25 | 36.23 |
| *iucC* | Aerobactin iron transport system | ExPEC | 8 | 11.59 |
| *sitA* | Iron caption system, Sit operon | ExPEC | 41 | 59.42 |
| *terC* | Tellerium ion resistance protein | ExPEC | 1 | 1.45 |
| *aufA* | Auf-fimbriae (chaperone-usher class fimbrial genes).Associated with Adhesion and Biofilm formation in all types of UTIs. | ExPEC | 14 | 20.29 |
| *yfcV* | Putative fimbriae | ExPEC | 34 | 49.28 |
| *nfaE* | Diffuse adherence fibrillar adhesin gene | ETEC | 1 | 1.45 |
| ***sta2*** | Heat-stabile enterotoxin ST-I group b | ETEC | 1 | 1.45 |
| *cfaE* | CFA/I pilus tip adhesin | ETEC | 1 | 1.45 |
| *tia* | Cell invasion determinant | ETEC/STEC | 4 | 5.80 |
| *iha* | Adherence protein | STEC | 5 | 7.25 |
| ***senB*** | Plasmid encoded enterotoxin | STEC | 6 | 8.70 |
| *lpfA* | Long polar fimbriae | STEC/EPEC | 34 | 49.28 |
| *mchB* | Microcin H47 part of colicin H | STEC/EPEC | 1 | 1.45 |
| *mchC* | MchC protein | STEC/EPEC | 1 | 1.45 |
| *mchF* | ABC transporter protein MchF | STEC/EPEC | 4 | 5.80 |
| *bfpB/E* | Bundle-forming pili, outer membrane lipoprotein | STEC/EPEC | 4 | 5.80 |
| *afaA* | Afimbrial adhesin (adhesion, colonization, has high tropism to kideny) associated with chronic cystitis/pyelonephritis, recurrent cystits/pylenophritis. | UPEC | 1 | 1.45 |
| *pap* | P-fimbriae (adhesion, colonization, cytokine production, invasion, inflammation, pain, renal tropism, pathogenesis) associated with upper UTIs, acute UTIs, acute pylenophritis, renal failures, acute cystitis. | UPEC | 7 | 10.14 |
| *mrk* | Type 3 fimbriae (biofilm formation) associated with catheter associated UTIs. | UPEC | 7 | 10.14 |
| *sfa* | S-fimbriae (adhesion, colonization, dissemination, bacterial ascending factor) associated with meningitis, septicemia and mostly severe upper UTIs. | UPEC | 24 | 34.78 |
| *auf* | Auf fimbriae chaperone-usher class fimbrial genes (adhesion and biofilm formation) associated with all types of UTIs. | UPEC | 14 | 20.29 |
| *iss* | Increased serum survival, serum resistance protein (neutralization of anti-bactericidal effect of serum) associated with mostly cystitis and pyelonephritis, bacteremia. | UPEC | 37 | 53.62 |
| *cvaC* | Serum resistance protein (neutralization of anti-bactericidal effect of serum) associated with mostly cystitis and pyelonephritis, bacteremia. | UPEC | 4 | 5.80 |
| *iutA* | Siderophore: Aerobactin receptor (growth, iron and hemin uptake system, biofilm formation) associated with severe UTIs. | UPEC | 8 | 11.59 |
| *entS* | Siderophore (growth, iron uptake) associated with severe UTIs. | UPEC | 68 | 98.55 |
| *iroN* | Siderophore: Aerobactin receptor or Salmochelin? (growth, iron uptake) associated with severe UTIs. | UPEC | 15 | 21.74 |
| *fyuA* | Siderophore: Yersiniabactin receptor (growth, iron uptake) associated with severe UTIs. | UPEC | 25 | 36.23 |
| *ybtP* | Siderophore (growth, iron uptake) associated with severe UTIs. | UPEC | 25 | 36.23 |
| *ybtQ* | Siderophore (growth, iron uptake) associated with severe UTIs. | UPEC | 25 | 36.23 |
| *chuA* | Siderophore, Hemin uptake system (biofilm formation, growth and iron uptake) associated with all types of UTIs. | UPEC | 33 | 47.83 |
| *ireA* | Siderophore, Hemin uptake system (biofilm formation, growth and iron uptake) associated with all types of UTIs. | UPEC | 1 | 1.45 |
| *iha* | Siderophore, Hemin uptake system (biofilm formation, growth and iron uptake) associated with all types of UTIs. | UPEC | 5 | 7.25 |
| ***sat*** | Serine protease autortransporter **toxin** (SAT) (cytotoxic effect on bladder and kidney) associated with mostly pyelonephritis. | UPEC | 7 | 10.14 |
| *cdt* | Cytolethal Distending **Toxin** (cytolethal factor, human cell apoptotic factor) associated with UTIs. | UPEC | 8 | 11.59 |
| *cnf1* | Cytotoxic Necrotizing Factor 1 (CNF1) **toxin** (invasion, apoptosis in cell bladder, host cell malfunction) associated with severe UTIs. | UPEC | 1 | 1.45 |
| *hlyA* | Alpha-hemolysin (**toxin**) (host cell lysis, hemolysis, growth adhesion and inflammation) associated with mostly severe and symptomatic UTIs. | UPEC | 2 | 2.90 |
| ***vat*** | Vacuolating autotransporter **toxin** (vat or vactox) (cytotoxic effect on bladder and kidney endothelial tissue) associated with mostly pyelonephritis. | UPEC | 12 | 17.39 |
| *tcpC* | Toll/interleukin receptor domain containing protein (**toxin**) (bacterial survival, human avoidance system, cytopathic effect on kidney) associated with mostly pyelonephritis | UPEC | 3 | 4.35 |
| papG-III |  | ? | 1 | 1.45 |
| **cma** | Colicin M | ? | 13 | 18.84 |

**References for Supplementary tables**

1 Boisen, N. *et al.* Redefining enteroaggregative Escherichia coli (EAEC): Genomic characterization of epidemiological EAEC strains. *PLoS Negl Trop Dis* **14**, e0008613 (2020). <https://doi.org/10.1371/journal.pntd.0008613>

2 Paramita, R. I. *et al.* Genome-based characterization of Escherichia coli causing bloodstream infection through next-generation sequencing. *PLoS One* **15**, e0244358 (2020). <https://doi.org/10.1371/journal.pone.0244358>

3 Jahandeh, N., Ranjbar, R., Behzadi, P. & Behzadi, E. Uropathogenic Escherichia coli virulence genes: invaluable approaches for designing DNA microarray probes. *Cent European J Urol* **68**, 452-458 (2015). <https://doi.org/10.5173/ceju.2015.625>
